# Supplementary material
Source: HighWire-hosted journal article supplement (https://www.annfammed.org/highwire/filestream/7531/field_highwire_adjunct_files/0/Bennett_SuppTbls1-2.pdf)
Supplement: Bennett_SuppTbls1-2.pdf [file Bennett_SuppTbls1-2.pdf]

**Online Supplementary Material**

Bennett IM, White S, Chen J, Soroui JS. The contribution of health literacy to disparities in self-rated health status and preventive health behaviors in older adults. *Ann Fam Med.* 2009;7(3):204-211.

<http://www.annfammed.org/cgi/content/full/7/3/204/DC1>

**Supplemental Table 1. Adjusted Relationship of Race/Ethnicity and Educational Attainment to Health Literacy for US Adults Aged 65 Years and Older in Households, Based on Marginal Maximum Likelihood (MML) Regression**

| Parameter                | Estimate of Regression Coefficient | Standard Error | P value   |
|--------------------------|------------------------------------|----------------|-----------|
| Constant                 | 2.75                               | 0.13           | <.001     |
| Race/ethnicity           |                                    |                |           |
| White                    | Reference                          | Reference      | Reference |
| Black                    | -0.47                              | 0.10           | <.001     |
| Hispanic                 | -0.82                              | 0.12           | <.001     |
| Other                    | -0.05                              | 0.22           | 0.811     |
| Educational attainment   |                                    |                |           |
| > High school            | Reference                          | Reference      | Reference |
| High school <sup>a</sup> | -0.39                              | 0.07           | <.001     |
| < High school            | -0.90                              | 0.10           | <.001     |
| Age                      | -0.04                              | 0.005          | <.001     |
| Sex                      |                                    |                |           |
| Male                     | Reference                          | Reference      | Reference |
| Female                   | 0.22                               | 0.06           | <.001     |
| Income                   |                                    |                |           |
| > 175% poverty level     | Reference                          | Reference      | Reference |
| 100-175% poverty level   | -0.33                              | 0.09           | <.001     |
| < Poverty level          | -0.57                              | 0.11           | <.001     |
| Nativity                 |                                    |                |           |
| US born                  | Reference                          | Reference      | Reference |
| Foreign born             | -0.57                              | 0.11           | <.001     |

Source: Data used are from the 2003 National Assessment of Adult Literacy, conducted by the National Center for Education Statistics, Institute of Education Sciences, US Department of Education.

<sup>a</sup> High school diploma or equivalency degree.

**Supplemental Table 2. Sobel Tests of Significant Mediation Effects of Health Literacy**

| Variable                            | Regression  |      | Sobel Test |      |      |         |
|-------------------------------------|-------------|------|------------|------|------|---------|
|                                     | Coefficient | SE   | Value      | SE   | Z    | P Value |
| Race/ethnicity                      |             |      |            |      |      |         |
| Black → HL                          | -0.47       | 0.10 | 0.12       | 0.03 | 3.77 | < .001  |
| HL (black) → health status          | -0.24       | 0.04 |            |      |      |         |
| Black → HL                          | -0.47       | 0.10 | 0.08       | 0.03 | 3.28 | < .001  |
| HL (black) → flu vaccine            | -0.18       | 0.04 |            |      |      |         |
| Educational attainment              |             |      |            |      |      |         |
| < High school → HL                  | -0.90       | 0.10 | 0.33       | 0.06 | 5.63 | < .001  |
| HL (< high school) → health status  | -0.36       | 0.05 |            |      |      |         |
| < High school → HL                  | -0.90       | 0.10 | 0.16       | 0.05 | 3.54 | < .001  |
| HL (< high school) → flu vaccine    | -0.18       | 0.05 |            |      |      |         |
| High school → HL                    | -0.39       | 0.07 | 0.14       | 0.04 | 4.00 | < .001  |
| HL (high school) → mammogram        | -0.36       | 0.06 |            |      |      |         |
| < High school → HL                  | -0.90       | 0.10 | 0.42       | 0.07 | 5.79 | < .001  |
| HL (< high school) → mammogram      | -0.46       | 0.06 |            |      |      |         |
| High school → HL                    | -0.39       | 0.07 | 0.12       | 0.03 | 4.33 | < .001  |
| HL (high school) → dental checkup   | -0.31       | 0.04 |            |      |      |         |
| < High school → HL                  | -0.90       | 0.10 | 0.72       | 0.09 | 7.67 | < .001  |
| HL (< high school) → dental checkup | -0.80       | 0.05 |            |      |      |         |

→ = path, Black → HL = the association between the independent variable (black dummy variable) and the mediator (health literacy); this is path a. HL = health literacy; HL (black) → health status = the association between the mediator (health literacy) and the dependent variable (health status) when controlling for the independent variable (black dummy variable); this is path b.

Note: Sobel test equation is  $Z = a * b / \sqrt{(b^2 * s_a^2 + a^2 * s_b^2 + s_a^2 * s_b^2)}$ . This Sobel test is the Aroian version suggested in Baron and Kenney.<sup>1</sup> Sobel tests were conducted only if Supplemental Table 1 showed that estimated regression coefficients of independent variables (ie, race/ethnicity and education dummy variables) were statistically significant in model A and the magnitude of the coefficients decreased after controlling for health literacy (model B), indicating potential mediation effects of health literacy.

**Reference**

1. Baron RM, Kenny DA. The moderator-mediator variable distinction in social psychological research: conceptual, strategic, and consideration. *J Pers Soc Psychol.* 1986;51(6):1173-1182.
